# Supplementary material for: HIV Nef and Vpu protect HIV-infected CD4+ T cells from antibody-mediated cell lysis through down-modulation of CD4 and BST2
Source: PubMed Central journal article supplement (PMC3930549; doi:10.1186/1742-4690-11-15), 2014-02-06

**A**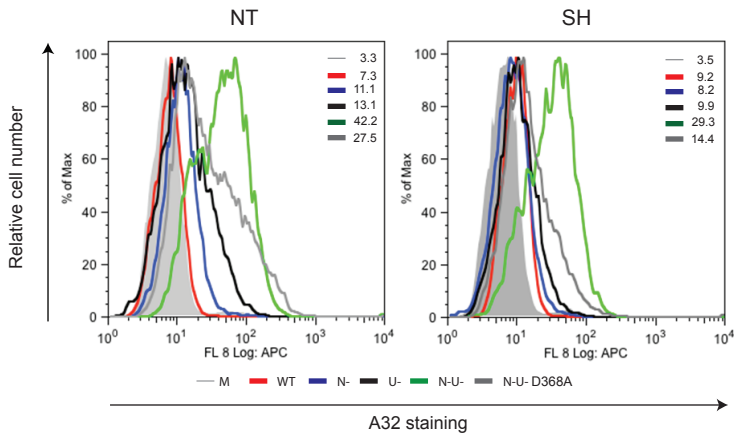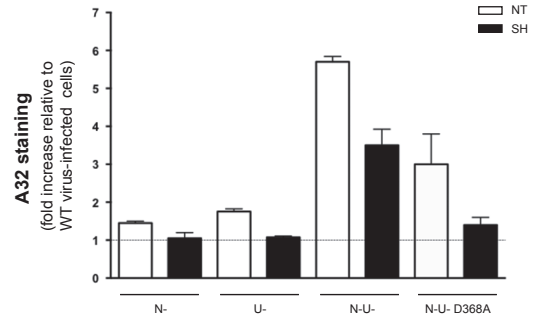**B**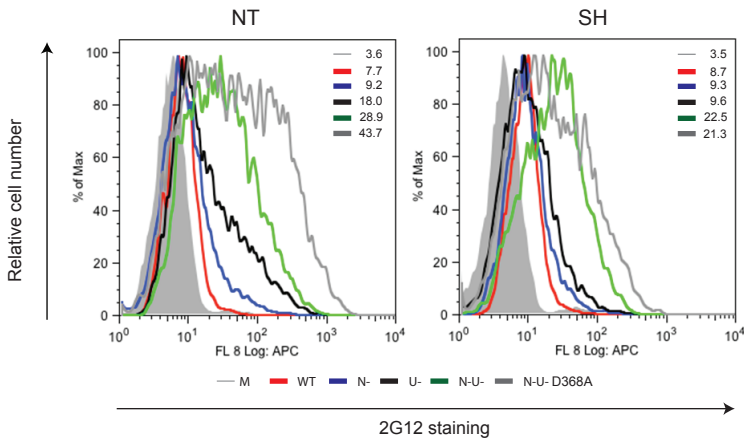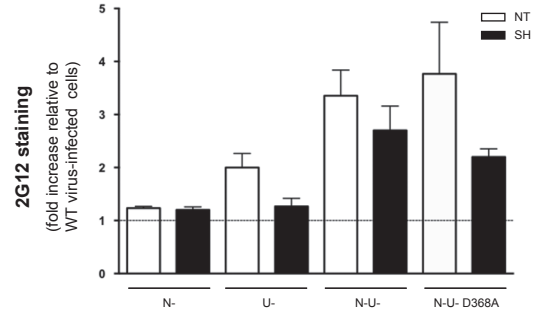

Supplement: 1742-4690-11-15-S1.pdf [file 1742-4690-11-15-S1.pdf]
